RESEARCH ARTICLE

# Diagnostic Value of Multiple Tumor Markers for Patients with Esophageal Carcinoma

Jun Zhang<sup>1</sup>, Zhenli Zhu<sup>1</sup>, Yan Liu<sup>1</sup>, Xueyuan Jin<sup>2</sup>, Zhiwei Xu<sup>3</sup>, Qiuyan Yu<sup>1</sup>, Ke Li<sup>1\*</sup>

**1** Department of Preventive Medicine, Shantou University Medical College, No. 22 Xinling Road, Shantou, Guangdong, 515041, China, **2** Department of International Center for Liver Disease Treatment, 302 PLA hospital, No. 100 Xisihuan Road, Beijing, 100017, China, **3** Department of Medical Quality Control, 302 PLA Hospital, No. 100 Xisihuan Road, Beijing, 100017, China

\* [kli@stu.edu.cn](mailto:kli@stu.edu.cn)

## Abstract

### Background

Various studies assessing the diagnostic value of serum tumor markers in patients with esophageal cancer remain controversial. This study aims to comprehensively and quantitatively summarize the potential diagnostic value of 5 serum tumour markers in esophageal cancer.

### Methods

We systematically searched PubMed, Embase, Chinese National Knowledge Infrastructure (CNKI) and Chinese Biomedical Database (CBM), through February 28, 2013, without language restriction. Studies were assessed for quality using QUADAS (quality assessment of studies of diagnostic accuracy). The positive likelihood ratio (PLR) and negative likelihood ratio (NLR) were pooled separately and compared with overall accuracy measures using diagnostic odds ratios (DORs) and symmetric summary receiver operating characteristic (SROC) curves.

### Results

Of 4391 studies initially identified, 44 eligible studies including five tumor markers met the inclusion criteria for the meta-analysis, while meta-analysis could not be conducted for 12 other tumor markers. Approximately 79.55% (35/44) of the included studies were of relatively high quality (QUADAS score  $\geq 7$ ). The summary estimates of the positive likelihood ratio (PLR), negative likelihood ratio (NLR) and diagnostic odds ratio (DOR) for diagnosing EC were as follows: CEA, 5.94/0.76/9.26; Cyfra21-1, 12.110.59/22.27; p53 antibody, 6.71/0.75/9.60; SCC-Ag, 7.66/0.68/12.41; and VEGF-C, 0.74/0.37/8.12. The estimated summary receiver operating characteristic curves showed that the performance of all five tumor markers was reasonable.

### Conclusions

The current evidence suggests that CEA, Cyfra21-1, p53, SCC-Ag and VEGF-C have a potential diagnostic value for esophageal carcinoma.

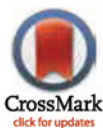

## OPEN ACCESS

**Citation:** Zhang J, Zhu Z, Liu Y, Jin X, Xu Z, Yu Q, et al. (2015) Diagnostic Value of Multiple Tumor Markers for Patients with Esophageal Carcinoma. PLoS ONE 10(2): e0116951. doi:10.1371/journal.pone.0116951

**Academic Editor:** William B. Coleman, University of North Carolina School of Medicine, UNITED STATES

**Received:** August 31, 2014

**Accepted:** December 17, 2014

**Published:** February 18, 2015

**Copyright:** © 2015 Zhang et al. This is an open access article distributed under the terms of the [Creative Commons Attribution License](https://creativecommons.org/licenses/by/4.0/), which permits unrestricted use, distribution, and reproduction in any medium, provided the original author and source are credited.

**Data Availability Statement:** All relevant data are within the paper's Results and [Table 1](#).

**Funding:** The authors have no support or funding to report.

**Competing Interests:** The authors have declared that no competing interests exist.

## Introduction

During the last several decades, the incidence of esophageal squamous cell carcinoma (ESCC) has been declining [1,2]. However, ESCC remains the predominant carcinoma in many countries of east and central Asia [3, 4]. Esophageal cancer (EC), which accounted for 482,300 new cases of cancer in 2008, is the eighth most common cancer worldwide, and has the sixth highest incidence of cancer mortality, with 406,800 deaths registered [5]. Although the prevalence is highest in Africa and Asia, the incidence of adenocarcinoma is rising in western countries and the Americas [6, 7]. Esophageal cancer (EC) is a highly aggressive malignancy due to rapid progression, late diagnosis, and poor prognosis of survival, making the mortality rate of EC patients similar to the rate of the incidence [8, 9]. However, overall survival could be significantly improved by early diagnosis, with a 5-year survival rate of up to 90% [10]. The majority of patients with early EC are asymptomatic and without clinical manifestations. The usual methods of computed tomography (CT) or endoscopic ultrasonography have limited usefulness in early detection because such procedures are often invasive, unpleasant, inconvenient and expensive. In addition, the optimal treatment strategy for advanced EC is still not well established. To our knowledge, there are no suitable diagnostic biomarkers of EC, in contrast to other tumors of the gastrointestinal tract. The spread of malignant tumors is a multistep process involving rapid growth and invasion into the lymph node and blood vessels [11]. Therefore, a low cost, non-invasive, convenient method for routine EC diagnosis is necessary. The detection of biomarkers in serum currently plays an important role in the detection of certain tumors and in monitoring for recurrence or metastasis. Serum tumor markers can be operationally defined as serum molecules whose levels can be used in the diagnosis, prognosis, or clinical management of malignant diseases [12]. Although various biochemical markers have been investigated in the diagnosis and follow-up of EC patients, including p53 antibody, carcinoembryonic antigen (CEA), squamous cell cancer antigen (SCC-Ag), cytokeratin 21-1 fragment (CYFRA21-1), and micro-RNA, there remains a great need to comprehensively and quantitatively summarize the potential diagnostic value of serum biomarkers in esophageal cancer.

## Materials and Methods

### Search strategy and study selection

PubMed, EMBASE, Chinese National Knowledge Infrastructure (CNKI) and Chinese Biomedical Database (CBM) were searched to identify suitable studies up to the 28<sup>th</sup> of February, 2013; no start data limit was applied. Articles were also identified by use of the related articles function in PubMed and the references of identified articles were searched manually. The search terms were 'esophageal neoplasm', 'blood OR serum', 'biomarker OR diagnostic marker', without language restriction. Conference abstracts and letters to journal editors were excluded because of the limited data contained within.

Two reviewers (Zhang J and Zhu ZL) independently assessed eligible articles based on titles and abstracts, and then the full texts of potentially eligible studies were retrieved for further assessment. Disagreements between the reviewers were resolved by consensus. Studies were included if they met the following inclusion criteria: (1) the performance of biomarkers for the diagnosis of EC were evaluated using a prospective or retrospective design, (2) all cases were diagnosed by a gold standard (pathologic examinations of biopsied specimens), serum must have been collected before any treatment, e.g. chemotherapy or radiotherapy, and controls were without other cancers, and (3) positive values of the cases and controls were reported, and the results of an individual study on diagnostic accuracy could be summarized in a 2×2 table. When the same author reported results obtained from the same patient population in several publications, only the most recent or the most complete report was included in the analysis to avoid overlap between cohorts.

## Assessment of methodological quality

Two dependent reviewers (Zhang J and Liu Y) used 11 items of published QUADAS (quality assessment for studies of diagnostic accuracy) guidelines as a tool to assess the included studies, and disagreements were resolved by consensus. The 11 items were recommended by the Cochrane Collaboration Methods group on screening and diagnostic tests [13]. The items got a “1” score if the item score was “yes”, and aggregate scores totaled 11. Items included covered patient spectrum, reference standard, disease progression bias, verification bias, review bias, clinical review bias, incorporation bias, test execution, study withdrawals, and indeterminate results. The QUADAS tool is presented together with guidelines for scoring each of the items included in the tool.

## Data extraction and management

The final eligible articles were reviewed independently by two reviewers (Zhang J and Zhu ZL), and disagreements were resolved by consensus. The following characteristics studies were extracted: (i) first author, year of publication, country of publication, (ii) participants' inclusion/exclusion criteria, ethnicity, disease stage, histology stage, diagnostic guidelines, and type of control, (iii) extraction time and storage temperature of the sample, assay method, cut-off value, blindness, and a detailed report of the assay procedure, (iv) the positive value of the cases and controls, and other comparison data (e.g. mean age, sex ratio, smoking, drinking) between cases and controls. If data from any of the above categories were not reported in the primary article, items were treated as “not reported”.

## Statistical analyses

We used standard methods recommended for meta-analysis of diagnostic test evaluations [14]. The positive likelihood ratio (PLR), negative likelihood ratio (NLR) and their 95% confidence interval (CI) were calculated using a random effects model according to the Mantel-Haensel method, and a random effects model based on Der Simonian and Laird [15]. The accuracy measure used was the diagnostic odds ratio (DOR) computed by the Moses' constant of linear method, which indicates the change in diagnostic performance of the test under study per unit increase in the covariant [16]. Summary receiver operating characteristic curves were used to summarize overall test performance, and the area under the SROC curve (AUC) was calculated. The potential problem associated with sensitivities and specificities of 100% were solved by adding 0.5 to all cells of the diagnostic 2×2 table [14].

We used a chi-squared test to detect statistically significant heterogeneity. Between-study heterogeneity was assessed using  $I^2$ , according to the formula:  $I^2 = 100\% \times (\text{Cochran Q} - \text{degrees of freedom}) / \text{Cochran Q}$  [17]. To detect cut-off threshold effects, the relationship between sensitivity and specificity was evaluated by using the Spearman correlation coefficient  $r$ . In order to check for possible publication bias, a funnel plot of the individual studies was made by plotting logDORs (logarithm of the diagnostic odds ratios) against the sample size [18]. All analyses were undertaken using Meta DiSc statistical software (version 1.4; Ramon y Cajal Hospital, Madrid, Spain) [19] and STATA SE12.0 software (Stata Corporation).

## Results

### Search results and study characteristics

The study selection is detailed in Fig. 1. Given the overlap between the records identified through database searching and the additional records identified through other sources, 3498 of the 4391 primary studies were strived in abstract form, and the full text was obtained of the

754 full text was obtained of the review. Of these, 379 articles, including a review and case report, were excluded because they provided insufficient information. An additional 315 were excluded because there was no control, and 16 studies with controls were subsequently excluded because they did not allow calculation for sensitivity or specificity. As a result of our database searches and the reference lists of relevant articles, we included in our meta-analysis 44 [12, 20–62] individual studies that comparatively assessed the value of serum biomarkers for EC diagnosis (see Table 1). Computation of the Spearman correlation coefficient between the logit of sensitivity and logit of 1-specificity of CEA, Cyfra21–1, p53 antibody, SCC-Ag and VEGF-C were calculated, indicating no threshold effect [63], and the positive correlation had no statistical significance.

## CEA

Seventeen studies (cases = 1017, controls = 2877) met the inclusion criteria for the meta-analysis. Approximately 52.94% (9/17) of the included studies were of high quality (QUADAS score  $\geq 7$ ). The sensitivity and specificity of the 17 selected CEA studies [12, 36–51] ranged from 8% to 70%, and from 57% to 100%, respectively; the pooled estimates and the corresponding PLR, NLR, DOR and AUC are shown in Table 2. A pooled PLR of 5.94 (95% CI: 3.24–10.89) suggests that patients with EC have a nearly 6-fold higher chance of being CEA test-positive compared with patients without EC. Also, the pooled negative likelihood ratio was 0.76 (95% CI: 0.67–0.86). For all 17 studies, the pooled DOR was 9.26 (95% CI: 4.24–20.22). There was heterogeneity between studies (Fig. 2). The symmetrical SROC for CEA gave an AUC of 0.74 (Fig. 2). In our study, the AUC for sp53 antibody was 0.71. Thus CEA had reasonable accuracy in terms of differential diagnosis in cases of EC.

## Cyfra21–1

Seven studies (cases = 1017, controls = 2877) met the inclusion criteria for the meta-analysis. Approximately 85.71% (6/7) of the included studies were of high quality (QUADAS score  $\geq 7$ ). The sensitivity and specificity of the 7 selected Cyfra21–1 studies [39, 48, 50, 52, 55, 57, 58] ranged from 36% to 63%, and from 89% to 100%, respectively; the pooled estimates and the corresponding PLR, NLR, DOR and AUC are shown in Table 2. A pooled PLR of 12.11 (95% CI: 5.02–29.24) suggests that patients with EC have a nearly 12-fold higher chance of being Cyfra21–1 test-positive compared with patients without EC. Also, the pooled negative likelihood ratio was 0.59 (95% CI: 0.52–0.66). For all 7 studies, the pooled DOR was 22.27 (95% CI: 8.20–57.67) (Fig. 2). There was heterogeneity between studies. The symmetrical SROC of Cyfra21–1 had an AUC of 0.58 (Fig. 2).

## P53 antibody

Sixteen studies [20–35] (cases = 1079, controls = 2260) met the inclusion criteria for the meta-analysis. Approximately 53.33% (8/15) of the included studies were of high quality (QUADAS score  $\geq 8$ ). The sensitivity and specificity of the 16 selected studies [20–35] ranged from 14% to 60%, and from 91% to 100%, respectively; the pooled estimates and the corresponding PLR and NLR are shown in Table 2. A pooled PLR of 6.71 (95% CI: 4.61–9.75) suggests that patients with EC have a nearly 7-fold higher chance of being s-p53-antibody test-positive compared with patients without EC. Also, the pooled negative likelihood ratio was 0.75 (95% CI: 0.69–0.82). For all 16 studies, the pooled DOR was 9.60 (95% CI: 6.25–14.76) (Fig. 2). There was heterogeneity between studies. Fig. 2 shows the symmetrical SROC for s-p53 antibody (serum p53 antibody) has an AUC of 0.73.

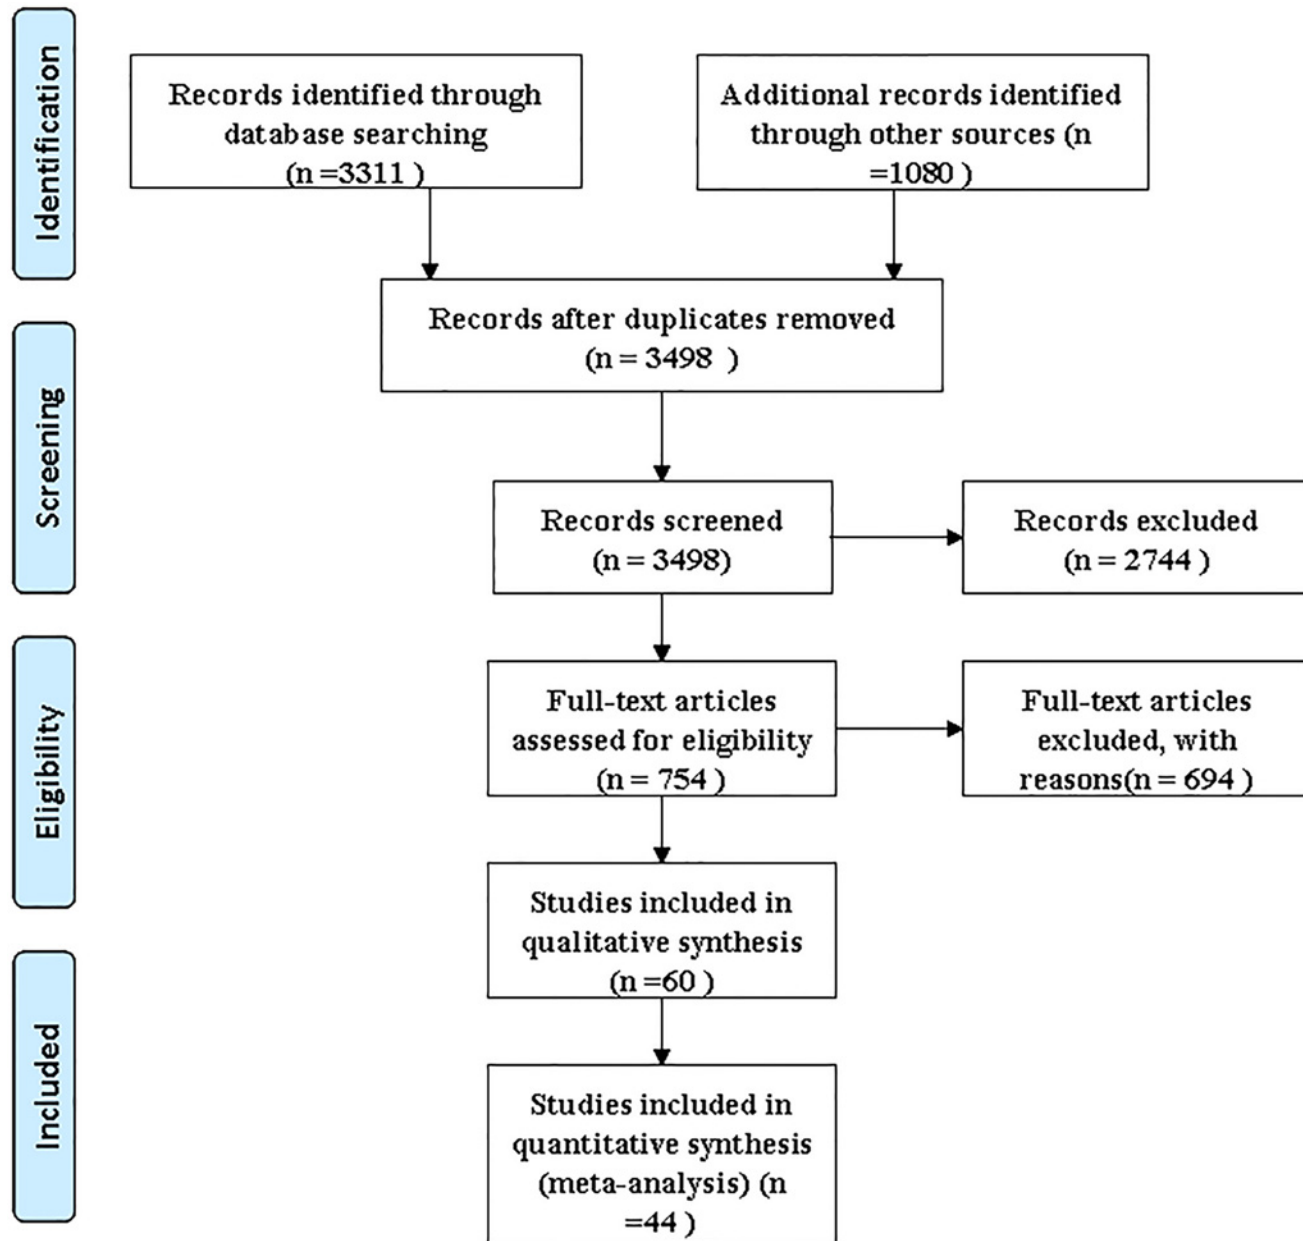

Fig 1. Flow chart of study selection by using electronic database searches.

doi:10.1371/journal.pone.0116951.g001

### SCC-Ag

Eleven studies [22, 39, 43, 45, 50–56] (cases = 918, controls = 867) met the inclusion criteria for the meta-analysis. Approximately 72.73% (8/11) of the included studies were of high quality (QUADAS score  $\geq 8$ ). The sensitivity and specificity of the 11 selected studies ranged from 13% to 64%, and from 91% to 100%, respectively; the pooled estimates and the corresponding PLR and NLR are shown in Table 2. A pooled PLR of 7.66 (95% CI: 4.24–13.83) suggests that patients with EC have a nearly 8-fold higher chance of being SCC-Ag test-positive compared with

**Table 1. Main characteristics of the eligible studies sorted by 5 different serum biomarkers.**

| First Author             | Country/<br>Year | Ref.<br>Standard | Assay method*                                                                        | Cut-off   | Sen* | Spec | Sample collection<br>time* | Stage I<br>(%)    | QUADAS |
|--------------------------|------------------|------------------|--------------------------------------------------------------------------------------|-----------|------|------|----------------------------|-------------------|--------|
| EUA KLWB<br>MUNCK-WI     | Sweden/<br>1988  | Unknown          | radioimmunoassay<br>techniques                                                       | 5µg /L    | 0.39 | 0.94 | unknown                    | 24/95<br>(25.26%) | 3      |
| Matthias<br>Baumann      | Germany<br>1988  | Histology        | spectrophotometry                                                                    | 5µg /L    | 0.08 | 0.57 | Before<br>treatment        | 3/12<br>(25%)     | 8      |
| Mortto<br>Uemara         | Japan/<br>1990   | Unknown          | forward sandwich<br>enzyme<br>immunoassay                                            | 3 µg/L    | 0.55 | 0.91 | unknown                    | unknown           | 3      |
| Thomas L.<br>Moskal      | America/<br>1995 | Unknown          | RIA                                                                                  | 1.5 ng/ml | 0.36 | 1.00 | unknown                    | 0                 | 2      |
| Kohtarou<br>Yamamoto     | Japan/<br>1997   | Histology        | ELISA                                                                                | 10 ng/ml  | 0.04 | 1.00 | Before<br>treatment        | 3/48<br>(6.25%)   | 8      |
| Ren Jun                  | China/<br>1999   | Histology        | PCR                                                                                  | unknown   | 0.17 | 0.99 | unknown                    | unknown           | 5      |
| Wang J                   | China/<br>2000   | Histology        | ELISA                                                                                | 50 ng/L   | 0.18 | 0.92 | unknown                    | unknown           | 6      |
| Feng XS                  | China/<br>2000   | Histology        | HD-2001A<br>biological protein<br>chip                                               | >5 ng/L   | 0.09 | 1.00 | unknown                    | unknown           | 4      |
| Barbara<br>Mroczko       | Poland/<br>2007  | Histology        | a microparticle<br>enzyme<br>immunoassays kit                                        | 4.0 ng/ml | 0.17 | 1.00 | before<br>operation        | 0/89<br>(0%)      | 7      |
| Ma JY                    | China/<br>2009   | Histology        | Multiple tumor<br>markers protein<br>chip kit                                        | 5µg /L    | 0.15 | 0.85 | unknown                    | unknown           | 7      |
| Wu XF                    | China/<br>2009   | Histology        | ABBOTYEAR2000<br>Access<br>Immunoassay<br>System                                     | 5µg /L    | 0.70 | 1.00 | unknown                    | unknown           | 4      |
| Mao XH                   | China/<br>2009   | Unknown          | electrochemilumines<br>cence immunoassay                                             | 5 ng/L    | 0.35 | 0.87 | unknown                    | unknown           | 4      |
| Zhao WJ                  | China/<br>2009   | Histology        | PCR                                                                                  | 5 ng/L    | 0.06 | 1.00 | unknown                    | unknown           | 7      |
| Liu WJ                   | China/<br>2010   | Histology        | electrochemilumines<br>cence immunoassay                                             | 5 ng/L    | 0.23 | 1.00 | unknown                    | unknown           | 7      |
| Huang ZC                 | China/<br>2011   | Histology        | electrochemilumines<br>cence immunoassay<br>electrochemiluminesc<br>ence immunoassay | 5 g/L     | 0.80 | 0.98 | before<br>treatment        | 24/97<br>(24.72%) | 7      |
| He J                     | China/<br>2011   | Histology        | Multiple tumor<br>markers protein chip<br>kit                                        | 5 ng/L    | 0.41 | 0.97 | before<br>operation        | unknown           | 8      |
| Lukaszewicz<br>-Zajzc M. | Poland/<br>2011  | Histology        | a microparticle<br>enzyme<br>immunoassay kits<br>(MEIA)                              | 4.0 ng/ml | 0.30 | 0.92 | before<br>operation        | 13/53<br>(24.53%) | 7      |

Cyfra21-1

(Continued)

Table 1. (Continued)

| First Author     | Country/<br>Year            | Ref.<br>Standard | Assay method*                               | Cut-off                                    | Sen* | Spec | Sample collection<br>time* | Stage I<br>(%)     | QUADAS |
|------------------|-----------------------------|------------------|---------------------------------------------|--------------------------------------------|------|------|----------------------------|--------------------|--------|
| Kohtarou         | Japan/<br>1997              | Histology        | ELISA                                       | 1.5<br>ng/ml                               | 0.48 | 1.00 | Before<br>treatment        | 3/48<br>(6.25%)    | 8      |
| JENS             | Germany<br>2000             | Histology        | immunoradio<br>metric                       | 1.4<br>ng/ml                               | 0.44 | 0.94 | unknown                    | unknown            | 7      |
| <b>ANN</b>       |                             |                  |                                             |                                            |      |      |                            |                    |        |
| Cheng ZZ         | China/<br>2008              | Histology        | electrochemilu<br>minescence<br>immunoassay | 3.3<br>ng/ml                               | 0.37 | 1.00 | Before<br>treatment        | unknown            | 7      |
| Du Xili          | China/<br>2010              | Histology        | ELECSYS                                     | 3.3<br>ng/ml                               | 0.36 | 1.00 | unknown                    | 55/280<br>(19.64%) | 6      |
| Liu WJ           | China/<br>2010              | Histology        | electrochemilu<br>minescence<br>immunoassay | 3.3<br>µg /L                               | 0.40 | 0.89 | unknown                    | unknown            | 7      |
| Huang ZC         | China/<br>2011              | Histology        | electrochemilu<br>minescence<br>immunoassay | 3.3<br>µg /L                               | 0.63 | 0.97 | Before<br>treatment        | 24/97<br>(24.72%)  | 7      |
| Dong Y           | China/<br>2011              | Histology        | IMX VIDAS                                   | 2.6<br>ng/ml                               | 0.39 | 0.98 | Before<br>treatment        | 19/247<br>(7.69%)  | 7      |
| <b>P53</b>       |                             |                  |                                             |                                            |      |      |                            |                    |        |
| Henlen M.        | America/<br>1988            | Histology        | EIA,<br>immunoblot,<br>precipitation        | unknown                                    | 0.22 | 0.95 | unknown                    | unknown            | 8      |
| Parashar K.      | India<br>Chandigarh<br>1988 | Unknown          | ELISA                                       | unknown                                    | 0.30 | 1.00 | unknown                    | unknown            | 6      |
| Shimada H.       | Japan/<br>2000              | Histology        | ELISA                                       | Index<br>> = 1.1,<br>Absorption<br>> = 1.6 | 0.40 | 1.00 | before<br>treatment        | unknown            | 10     |
| Hagiwara N.      | Japan/<br>2000              | Histology        | Sandwich<br>ELISA                           | unknown                                    | 0.28 | 1.00 | before<br>treatment        | 6/46<br>(13.0%)    | 7      |
| Ralhan R.        | India New<br>Delhi/<br>2000 | Histology        | ELISA                                       | unknown                                    | 0.60 | 0.92 | before<br>treatment        | 6/60<br>(10.0%)    | 9      |
| Hiroshi<br>SAKAI | Japan/<br>2001              | Histology        | ELISA                                       | 1 u/ml                                     | 0.18 | 0.91 | unknown                    | unknown            | 7      |
| Kozlowski<br>M.  | Poland/<br>2001             | Unknown          | ELISA                                       | Index<br>> = 1.1                           | 0.27 | 1.00 | before<br>diagnosis        | 4/75<br>(5.3%)     | 7      |
| Shimada H.       | Japan/<br>2002              | Histology        | ELISA                                       | 1.3<br>U/ml                                | 0.27 | 0.95 | unknown                    | 50/105<br>(47.6%)  | 8      |
| Shimada H.       | Japan/<br>2003              | Unknown          | ELISA                                       | 1.3<br>U/ml                                | 0.30 | 0.94 | unknown                    | unknown            | 6      |

(Continued)

Table 1. (Continued)

| First Author        | Country/Year | Ref. Standard | Assay method*                        | Cut-off                                    | Sen* | Spec | Sample collection time*    | Stage I (%)        | QUADAS |
|---------------------|--------------|---------------|--------------------------------------|--------------------------------------------|------|------|----------------------------|--------------------|--------|
| Wang M.H.           | China/2004   | Histology     | ELISA                                | Index<br>> = 1.1,<br>Absorption<br>> = 1.6 | 0.47 | 1.00 | before<br>treatment        | 10/38<br>(26.3%)   | 9      |
| Hiroyuki K.         | Japan/2005   | Histology     | ELISA                                | 1.3<br>U/ml                                | 0.32 | 1.00 | unknown                    | 13/57<br>(22.8%)   | 8      |
| Meghiorino R.       | China/2005   | Histology     | ELISA                                | Normal<br>mean<br>+3SD                     | 0.14 | 0.98 | before<br>chemotherapy     | unknown            | 8      |
| Looi K.             | China/2006   | Unknown       | ELISA                                | Normal<br>mean<br>+3SD                     | 0.07 | 0.99 | before<br>diagnosis        | unknown            | 7      |
| Muller M.           | Germany/2006 | Histology     | immunoblot                           | unknown                                    | 0.20 | 1.00 | unknown                    | unknown            | 7      |
| Cai H.Y.            | China/2008   | Histology     | ELISA                                | unknown                                    | 0.39 | 1.00 | before<br>chemo<br>therapy | 10/46<br>(21.7%)   | 8      |
| Wu M.               | China/2010   | Unknown       | ELISA                                | unknown                                    | 0.14 | 0.99 | unknown                    | unknown            | 6      |
| <b>SCC-Ag</b>       |              |               |                                      |                                            |      |      |                            |                    |        |
| First Author        | Country/year | Ref. Standard | Assay method*                        | Cut-off                                    | Sen* | Spec | Sample collection time*    | Stage I (%)        | QUADAS |
| Kohtarou Yamamoto   | Japan/1997   | Histology     | ELISA                                | 1.5<br>ng/ml                               | 0.25 | 1.00 | Before<br>treatment        | 3/48<br>(6.25%)    | 8      |
| Hagiwara N.         | Japan/2000   | Histology     | ELISA                                | 1.5<br>ng/ml                               | 0.13 | 0.92 | before<br>treatment        | 6/46<br>(13.0%)    | 7      |
| Barbara Mroczko     | Poland/2007  | Histology     | chemiluminescenc<br>assays<br>(CMIA) | 2 ng/ml                                    | 0.64 | 0.93 | before<br>operation        | 0/89<br>(0%)       | 7      |
| Cheng ZZ            | China/2008   | Histology     | ELISA                                | 2 ng/ml                                    | 0.26 | 1.00 | Before<br>treatment        | unknown            | 7      |
| Cao Mei             | China/2009   | Histology     | ELISA                                | 1.2<br>ng/ml                               | 0.41 | 1.00 | before<br>operation        | 11/108<br>(10.19%) | 6      |
| Mao XH              | China/2009   | Unknown       | MEIA                                 | 1.5<br>µg/L                                | 0.39 | 0.92 | unknown                    | unknown            | 4      |
| Huang ZC            | China/2011   | Histology     | MEIA                                 | 1.5<br>µg /L                               | 0.43 | 0.91 | Before<br>treatment        | 24/97<br>(24.72%)  | 7      |
| Dong Y              | China/2011   | Histology     | IMX<br>VIDAS                         | 1.5<br>ng/ml                               | 0.23 | 0.98 | Before<br>treatment        | 19/247<br>(7.69%)  | 7      |
| Lukaszewicz Zajc M. | Poland/2011  | Histology     | ELISA                                | 2<br>ng/ml                                 | 0.25 | 0.96 | before<br>operation        | 13/53<br>(24.53%)  | 7      |
| Atsuki Lkeda        | Japan/2011   | Histology     | chromatography                       | unknown                                    | 0.47 | 0.92 | unknown                    | 1/15<br>(6.67%)    | 6      |
| M. Cao              | China/2011   | Histology     | ELISA                                | 1.2<br>ng/ml                               | 0.38 | 1.00 | unknown                    | 15/56<br>(26.79)   | 7      |

(Continued)



Table 1. (Continued)

| First Author        | Country/Year | Ref. Standard | Assay method*    | Cut-off     | Sen* | Spec | Sample collection time* | Stage I (%)    | QUADAS |
|---------------------|--------------|---------------|------------------|-------------|------|------|-------------------------|----------------|--------|
| <b>VEGF-C</b>       |              |               |                  |             |      |      |                         |                |        |
| First Author        | Country/year | Ref. Standard | Assay method*    | Cut-off     | Sen* | Spec | Sample collection time* | Stage I (%)    | QUADAS |
| M. Krzystek         | Poland/2011  | Histology     | unknown          | 12.14 µg/ml | 0.85 | 0.53 | preceding treatment     | unknown        | 7      |
| -Korpacka           |              |               |                  |             |      |      |                         |                |        |
| Mirosław Kozłowski  | Poland/2010  | Histology     | ELISA            | unknown     | 0.64 | 0.80 | before surgery          | 11/149 (7.38%) | 7      |
| Malgorzata Krzystek | Poland/2007  | Histology     | immuno enzymatic | 13.14 ng/ml | 0.79 | 0.76 | at admission            | 0              | 7      |
| -Korpacka           |              |               |                  |             |      |      |                         |                |        |
| Malgorzata krz-Kor  | Poland/2006  | Histology     | ELISA            | 14.57 ng/ml | 0.70 | 0.81 | unknown                 | 0              | 7      |

Note: ELISA\* = Enzyme-linked immunosorbent assay; TP\* = true positives, FP\* = false positives, FN\* = false negatives, TN\* = true negatives; Abs\* = Antibody.

Assay method\*: ELISA or ELISA+western = 1; other = 0; unknown = 2.

Formula 1\*: normal+2SD

Formula 2\*: P53 control protein ratio >1.3

Formula 3\*: density >1030

Formula 4\*: optical density >0.11

Formula 5\*: manufacturer's formula

Formula 6\*: the differences in the absorption values between the positive walls and controls was greater than 0.5

Formula 7\*: differences higher than 0.15 were scored positive

Formula 8\*: index ≥ 1.1, Absorption > = 1.6

Formula 9\*: ≥ 2.3-times of control

Formula 10\*: mean+3SD

Note: Sample collection time\*: before diagnosis = 1; before treatment = 0; unknown = 2.

doi:10.1371/journal.pone.0116951.t001

patients without EC. Also, the pooled negative likelihood ratio was 0.68 (95% CI: 0.61–0.77). For all 16 studies, the pooled DOR was 12.41 (95% CI: 6.47–23.81) (Fig. 2). There was heterogeneity between studies. The symmetrical SROC of s-p53 antibody gives an AUC of 0.69.

### VEGF-C

Four studies (cases = 363, controls = 195) met the inclusion criteria for the meta-analysis. All four included studies were of high quality (QUADAS score ≥ 7), with sensitivity and specificity ranging from 64% to 85% and from 53% to 81%, respectively; The pooled estimates and the corresponding PLR and NLR are shown in Table 2. A pooled PLR of 2.74 (95% CI: 1.85–4.07) suggests that patients with EC have a nearly 3-fold higher chance of being VEGF-C test-positive compared with patients without EC. Also, the pooled negative likelihood ratio was 0.37 (95% CI: 0.29–0.47). For all four studies, the pooled DOR was 8.12 (95% CI: 5.37–12.27). There was heterogeneity between studies. Fig. 3 shows the symmetrical SROC of VEGF-C has an AUC of 0.81.

**Table 2. Diagnostic accuracy of CEA, Cyfra21–1, p53, SCC-Ag, and VEGF-C for EC.**

|           | No. | Case (n) | Control (n) | PLR (95%CI) *     | NLR (95%CI) *    | DOR (95%CI) *      | AUC  |
|-----------|-----|----------|-------------|-------------------|------------------|--------------------|------|
| CEA       | 17  | 1017     | 2877        | 5.94 (3.24–10.89) | 0.76 (0.67–0.86) | 9.26 (4.24–20.22)  | 0.71 |
| Cyfra21–1 | 7   | 872      | 483         | 12.11(5.02–29.24) | 0.59 (0.52–0.66) | 22.27 (8.60–57.67) | 0.58 |
| P53       | 16  | 1096     | 2384        | 6.71(4.61–9.75)   | 0.75(0.69–0.82)  | 9.60 (6.25–14.76)  | 0.73 |
| SCC-Ag    | 11  | 918      | 867         | 7.66(4.24–13.83)  | 0.68 (0.61–0.77) | 12.41 (6.47–23.81) | 0.69 |
| VEGF-C    | 4   | 363      | 195         | 2.74 (1.85–4.07)  | 0.37 (0.29–0.47) | 8.12 (5.37–12.27)  | 0.81 |

Note:PLR: positive likelihood ratio, NLR: negative likelihood ratio, DOR: diagnostic odds ratio, AUC: the area under the SROC curve; PLR (95% CI) \*, DOR (95% CI) \* and NLR (95% CI) \* were calculated using a random effect model.

doi:10.1371/journal.pone.0116951.t002

### Publication bias

Publication bias is assessed visually by using a scatter plot of the inverse square root of the effective sample size ( $1/ESS^{1/2}$ ) versus the diagnostic log odds ratio ( $\ln DOR$ ), which should have a symmetrical funnel shape when publication bias is absent [64]. Formal testing for publication bias can be conducted by a regression of  $\ln DOR$  against  $1/ESS^{1/2}$ , weighting by  $ESS$  [64], with

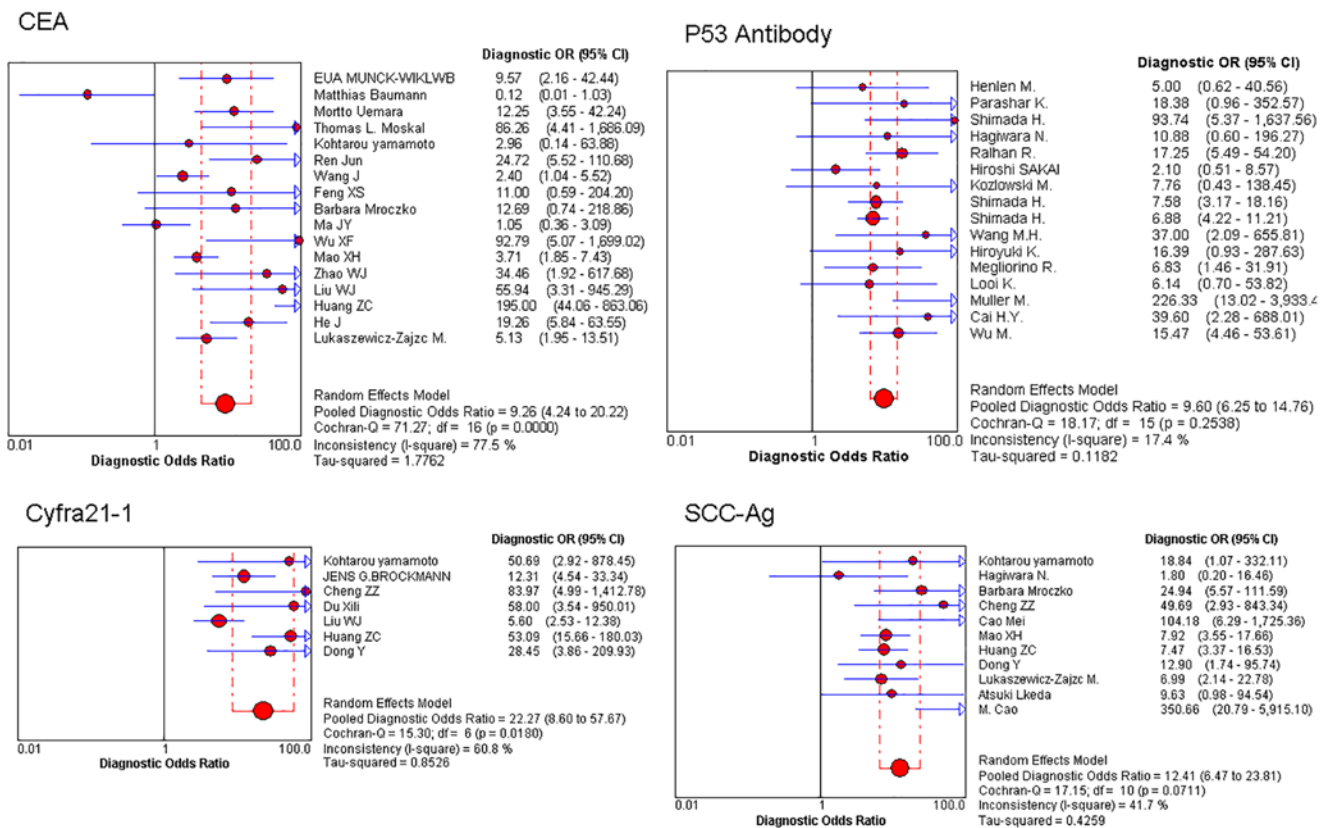

**Fig 2. Forest plot of estimates of the diagnostic odds ratio (DOR) for CEA, Cyfra21–1, p53, and SCC-Ag in the diagnosis of EC.** Point estimates of the diagnostic odds ratio from each study are shown as solid circles. Error bars are 95% confidence intervals.

doi:10.1371/journal.pone.0116951.g002

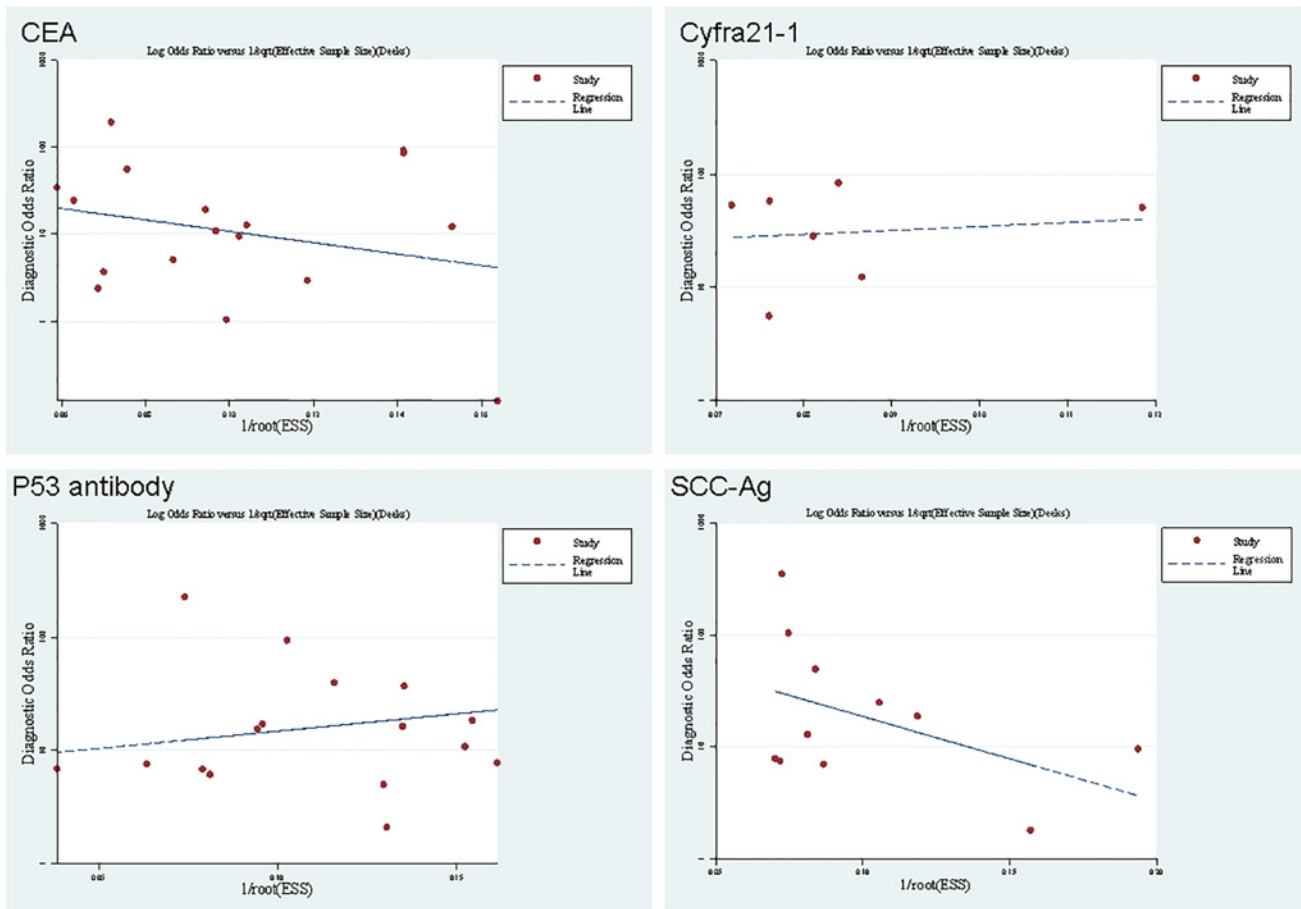

**Fig 3. Funnel plot for the assessment of potential bias in CEA, Cyfra21–1, p53 and SCC-Ag assays.** The funnel graph plots the DOR (diagnostic odds ratio) against the 1/root (effective sample size), the dotted line is the regression line.

doi:10.1371/journal.pone.0116951.g003

a slope coefficient of  $P < 0.05$  indicating significant asymmetry. Although meta-analysis itself has some bias, the results showed no publication bias in this meta-analysis (CEA,  $p = 0.339$ ; Cyfra21–1,  $p = 0.841$ ; p53,  $p = 0.408$ ; SCC-Ag,  $p = 0.397$ ). The funnel plots (Fig. 3) for publication bias also showed symmetry.

## Discussion

Making a differential diagnosis between EC and non-EC is a critical clinical problem and conventional tests are not always. Usually, histological examination is used to diagnose EC. More and more studies have been focused on the detection of serological tumor markers in EC to evaluate the diagnostic and clinical usefulness. The overall specificity of CEA, Cyfra21–1, p53 antibody, SCC-Ag and VEGF-C were 98.0%, 97.8%, 98.4%, 98.0% and 73.2%, respectively. The summary estimate of the sensitivities for the five tumor markers were, however, all quite low and were more variable than the specificity. These data suggest a potential role for determination of these tumor markers in confirming EC. However, these tests maximize specificity at the cost of sensitivity, and this trade-off has significant clinical implications. By contrast with the higher specificity, these tumor markers had low sensitivities that were not sufficiently low to exclude non-EC when the tumor marker concentrations are lower than the cut-off values.

Negative tests do not therefore mean absence of EC, and patients with negative tumor marker results have a fairly high chance of having EC.

The SROC curve presents a global summary of test performance and shows the trade-off between sensitivity and specificity. On the other hand, mean AUC ranged from 0.73 to 0.88, suggesting that the overall accuracy of tumor markers in diagnosing EC is not as high as expected. The DOR is a single indicator of test accuracy that combines the data from sensitivity and specificity into a single number. The DOR of a test is the ratio of the odds of a positive test result in a subject with the disease relative to the odds of a positive test result in a subject without the disease [65]. The value of a DOR ranges from 0 to infinity, with higher values indicating better discriminatory test performance (higher accuracy). A DOR of 1.0 indicates that a test does not discriminate between patients with the disorder and those without it. A DOR value of 1.00 suggests improper test interpretation (a greater proportion of negative test results in the group with disease) [65]. In the present meta-analysis, we find that the mean DOR values for CEA, Cyfra21-1, p53 antibody, SCC-Ag and VEGF-C were 16.67, 34.56, 22.88, 24.99 and 7.97, respectively, indicating that, although not as good as expected, measurement of these four tumor markers could be helpful in the diagnosis of EC. Since the SROC curve and the DOR are not easy to interpret and use in clinical practice, and since the likelihood ratios are considered more clinically meaningful [66, 67], we also present both the PLR and NLR as measures of diagnostic accuracy for the tumor markers. Likelihood ratios of 10 or 0.1 generate large and often conclusive shifts from pre-test to post-test probability (indicating high accuracy) [67]. Our data show that overall PLR values for CEA, Cyfra21-1, p53 antibody, SCC-Ag and VEGF-C ranged from 7.97 to 34.55, suggesting that patients with EC have a nearly 8- to 35-fold higher chance of being positive compared to patients without EC. On the other hand, the mean NLR values of CEA, Cyfra21-1, p53 antibody, SCC-Ag and VEGF-C ranged from 0.35 to 0.76, so if the assay results are negative, the probability that this patient has EC ranges from 35% to 76%, which is too high to rule out EC. In addition to the five tumor markers analyzed in the present meta-analysis, other biomarkers such as plasma deoxyribonucleic acid, serum Dickkopf-1, matrix metalloproteinase 9, matrix metalloproteinase 7, serum interleukin 6, serum makorin 1 antibody, human leukocyte antigen-G, serum TRIM21 antibody, serum hyaluronic acid, cell division cycle 25B antibody, heat shock protein 70 antibody, glutathione S-transferase n, have been evaluated for their use in the diagnosis of EC. However, there were no sufficient eligible primary studies for our meta-analysis.

Although we tried to avoid bias in the process of identifying studies, screening, assessing, data extraction, and data analyses, the present study has several limitations. First, the exclusion of conference abstracts and letters to journal editors may have led to publication bias, an inflation of accuracy estimates due to preferential acceptance of papers reporting favorable results, and the potential for publication bias in studies included in the present meta-analysis. Second, we did not calculate the diagnostic accuracy for early stage (stage I-II) cancers because sufficient raw data was not provided. Although we aimed to evaluate the diagnostic value of tumor markers for the early diagnosis of the cancer, cancer patients regardless of disease stage were used to evaluate the diagnostic power because of the limited amount of information. Primary data was unavailable for investigation of elevated or decreased tumor marker-positive values as a function of tumor type, histology, age, or degree. Also, because of lack of required data reported in the original publications, we did not calculate the diagnostic value of the combination of tumor markers. Thirdly, we excluded 20 studies because they did not provide data allowing construction of 2×2 tables. We did not contact authors to obtain further data, potentially resulting in biased results and less precise estimates of pooled diagnostic accuracy. Finally, we only included five biomarkers because the other 12 biomarkers could not be pooled as lacking of insufficient studies. As we all known, meta-analysis must pool two studies at least. The last

but not the least, in all 44 studies, cancer patients diagnosed by histology was regarded as positive. However, the negative controls without cancer that were healthy or had benign disease were not diagnosed by histology. In addition, most of the studies did not report whether the investigators were blinded. Therefore, such non-strict designs could exaggerate the diagnostic accuracy and lead to bias due to unfavorable representation of the participants.

The accuracy of tumor marker determinations for EC seems to be similar to that of conventional tests such as cytological examination, which has high specificity and low sensitivity. This similarity might make tumor markers less useful in practice because they do not have test properties that complement the properties of conventional tests. However, it should be pointed out that, to date, there are insufficient related studies to evaluate the diagnostic accuracy of the combination of two or more tumor markers in EC.

In conclusion, current evidence suggests that CEA, Cyfra21-1, p53 antibody, SCC-Ag and VEGF-C are highly specific, but insufficiently sensitive to diagnose EC. Patients with cancer have a higher chance of being CEA-, Cyfra21-1-, p53 antibody-, SCC-Ag- and VEGF-C-positive compared to patients without cancer. Although CEA, Cyfra21-1, p53, SCC-Ag and VEGF-C have a potential diagnostic value for esophageal carcinoma, we do not recommend using one tumor marker alone for the diagnosis of EC. Further studies may need to identify patterns of multiple biomarkers to further increase the power of EC detection.

## Supporting Information

### S1 PRISMA Checklist.

(DOC)

## Author Contributions

Conceived and designed the experiments: KL. Performed the experiments: JZ ZZ YL. Analyzed the data: JZ ZX. Contributed reagents/materials/analysis tools: JZ KL XJ QY. Wrote the paper: JZ.

## References

1. Bosetti C, Levi F, Ferlay J, Garavello W, Lucchini F, et al. (2008) Trends in oesophageal cancer incidence and mortality in Europe. *International journal of cancer Journal international du cancer*, 122(5):1118–1129. PMID: [17990321](#)
2. Cook MB, Chow WH, Devesa SS (2009) Oesophageal cancer incidence in the United States by race, sex, and histologic type, 1977–2005. *British journal of cancer*, 101(5):855–859. doi: [10.1038/sj.bjc.6605246](#) PMID: [19672254](#)
3. He YT, Hou J, Chen ZF, Qiao CY, Song GH, et al. (2008) Trends in incidence of esophageal and gastric cardia cancer in high-risk areas in China. *European journal of cancer prevention: the official journal of the European Cancer Prevention Organisation (ECP)*, 17(2):71–76.
4. Lu CL, Lang HC, Luo JC, Liu CC, Lin HC, et al. (2010) Increasing trend of the incidence of esophageal squamous cell carcinoma, but not adenocarcinoma, in Taiwan. *Cancer causes & control: CCC*, 21(2):269–274. doi: [10.3892/mmr.2015.3261](#) PMID: [25625774](#)
5. Jemal A, Bray F, Center MM, Ferlay J, Ward E, et al. (2011) Global cancer statistics. *CA: a cancer journal for clinicians*, 61(2):69–90.
6. Kollarova H, Machova L, Horakova D, Janoutova G, Janout V (2007) Epidemiology of esophageal cancer—an overview article. *Biomedical papers of the Medical Faculty of the University Palacky, Olomouc, Czechoslovakia*, 151(1):17–20. PMID: [17690734](#)
7. Simard EP, Ward EM, Siegel R, Jemal A (2012) Cancers with increasing incidence trends in the United States: 1999 through 2008. *CA: a cancer journal for clinicians*.
8. Crew KD, Neugut AI (2004) Epidemiology of upper gastrointestinal malignancies. In: *Seminars in oncology*: Elsevier; 2004: 450–464.
9. Vaupel P, Mayer A (2007) Hypoxia in cancer: significance and impact on clinical outcome. *Cancer and Metastasis Reviews*, 26(2):225–239. PMID: [17440684](#)

10. Zhou S-L, Wang L-D (2010) Circulating microRNAs: novel biomarkers for esophageal cancer. *World journal of gastroenterology: WJG*, 16(19):2348. PMID: [20480519](#)
11. Samantaray S, Sharma R, Chattopadhyaya T, Gupta SD, Ralhan R (2004) Increased expression of MMP-2 and MMP-9 in esophageal squamous cell carcinoma. *Journal of cancer research and clinical oncology*, 130(1):37–44. PMID: [14569466](#)
12. Moskal TL, Huang S, Ellis LM, Fritsche H, Chakrabarty S(1995) Serum levels of transforming growth factor alpha in gastrointestinal cancer patients. *Cancer Epidemiology Biomarkers & Prevention*, 4(2):127–131. doi: [10.1111/jpi.12209](#) PMID: [25623733](#)
13. Smidt N, Deeks J, Moore T (2011) Guide to the contents of a Cochrane review and protocol. *Cochrane Handbook for Systematic Reviews of Diagnostic Test Accuracy*.
14. Deville WL, Buntinx F, Bouter LM, Montori VM, de Vet HC, et al. (2002).; Conducting systematic reviews of diagnostic studies: didactic guidelines. *BMC medical research methodology*, 2:9. PMID: [12097142](#)
15. DerSimonian R, Laird N (1986) Meta-analysis in clinical trials. *Controlled clinical trials*, 7(3):177–188. PMID: [3802833](#)
16. Gu P, Huang G, Chen Y, Zhu C, Yuan J, et al. (2007) Diagnostic utility of pleural fluid carcinoembryonic antigen and CYFRA 21–1 in patients with pleural effusion: a systematic review and meta-analysis. *Journal of clinical laboratory analysis*, 21(6):398–405. PMID: [18022924](#)
17. Dinnes J, Deeks J, Kirby J, Roderick P (2005) A methodological review of how heterogeneity has been examined in systematic reviews of diagnostic test accuracy. *Health Technology Assessment*, 9(12):1–113. PMID: [15774235](#)
18. Egger M, Davey Smith G, Schneider M, Minder C (1997) Bias in meta-analysis detected by a simple, graphical test. *BMJ (Clinical research ed)*, 315(7109):629–634. PMID: [9310563](#)
19. Zamora J, Abraira V, Muriel A, Khan K, Coomarasamy A (2006) Meta-DiSc: a software for meta-analysis of test accuracy data. *BMC medical research methodology*, 6:31. PMID: [16836745](#)
20. Cawley HM, Meltzer SJ, De Benedetti VM, Hollstein MC, Muehlbauer KR, et al. (1998) Anti-p53 antibodies in patients with Barrett's esophagus or esophageal carcinoma can predate cancer diagnosis. *Gastroenterology*, 115(1):19–27. PMID: [9649454](#)
21. Parashar K, Sobti R(1998) A study on p53 protein and anti-p53 antibodies in the sera of patients with oesophageal cancer. *Mutation Research/Fundamental and Molecular Mechanisms of Mutagenesis*, 422(2):271–277.
22. Hagiwara N, Onda M, Miyashita M, Sasajima K (2000) Detection of circulating anti-p53 antibodies in esophageal cancer patients. *Journal of Nippon Medical School*, 67(2):110–117. PMID: [10754600](#)
23. Ralhan R, Arora S, Chattopadhyay TK, Shukla NK, Mathur M (2000) Circulating p53 antibodies, p53 gene mutational profile and product accumulation in esophageal squamous-cell carcinoma in India. *International journal of cancer Journal international du cancer*, 85(6):791–795. PMID: [10709097](#)
24. Shimada H, Takeda A, Arima M, Okazumi S, Matsubara H, et al.(2000) Serum p53 antibody is a useful tumor marker in superficial esophageal squamous cell carcinoma. *Cancer*, 89(8):1677–1683. PMID: [11042560](#)
25. Kozlowski M, Kovalchuk O, Niklinski J, Chyczewski L, Staroslawska E, et al. (2001) Circulating anti-p53 antibodies in esophageal cancer patients. *Folia histochemica / Polish Academy of Sciences, Polish Histochemical and Cytochemical Society*, 39 Suppl 2:173–174.
26. Sakai H (2002) Detection of serum anti-p53 antibodies in patients with various types of cancer]. *Rinsho byori The Japanese journal of clinical pathology*, 50(1):90. PMID: [11871143](#)
27. Shimada H, Nabeya Y, Okazumi S, Matsubara H, Funami Y, et al. (2002).; Prognostic significance of serum p53 antibody in patients with esophageal squamous cell carcinoma. *Surgery*, 132(1):41–47. PMID: [12110794](#)
28. Shimada H, Ochiai T, Nomura F (2003) Titration of serum p53 antibodies in 1,085 patients with various types of malignant tumors: a multiinstitutional analysis by the Japan p53 Antibody Research Group. *Cancer*, 97(3):682–689. PMID: [12548611](#)
29. Wang MH, Li YP, Wang XD, Zhang H, Xiong LH, et al. (2004) [Correlation between serum p53 antibody and chemosensitivity in patient with esophageal cancer]. *Ai zheng = Aizheng = Chinese journal of cancer*, 23(4):467–470. PMID: [15087041](#)
30. Kato H, Nakajima M, Fukuchi M, Miyazaki T, Manda R, et al. (2005) Serum p53 antibodies in drainage blood from the azygos vein in patients with esophageal carcinoma. *Anticancer research*, 25(5):3231–3235. PMID: [16101132](#)
31. Megliorino R, Shi FD, Peng XX, Wang X, Chan EK, et al. (2005) Autoimmune response to anti-apoptotic protein survivin and its association with antibodies to p53 and c-myc in cancer detection. *Cancer detection and prevention*, 29(3):241–248. PMID: [15896923](#)

32. Looi K, Megliorino R, Shi FD, Peng XX, Chen Y, et al. (2006) Humoral immune response to p16, a cyclin-dependent kinase inhibitor in human malignancies. *Oncology reports*, 16(5):1105–1110. PMID: [17016600](#)
33. Muller M, Meyer M, Schilling T, Ulsperger E, Lehnert T, et al. (2006) Testing for anti-p53 antibodies increases the diagnostic sensitivity of conventional tumor markers. *International journal of oncology*, 29(4):973–980. PMID: [16964393](#)
34. Cai HY, Wang XH, Tian Y, Gao LY, Zhang LJ, et al. (2008) Changes of serum p53 antibodies and clinical significance of radiotherapy for esophageal squamous cell carcinoma. *World journal of gastroenterology: WJG*, 14(25):4082–4086. PMID: [18609695](#)
35. Wu M, Mao C, Chen Q, Cu X-W, Zhang W-S (2010) Serum p53 protein and anti-p53 antibodies are associated with increased cancer risk: a case–control study of 569 patients and 879 healthy controls. *Molecular biology reports*, 37(1):339–343. doi: [10.1007/s11033-009-9744-7](#) PMID: [19693693](#)
36. Baumann M, Brand K, Giedl J, Hermanek P, Ruf S, et al. (1988) Significance of serum phosphohexose isomerase in gastrointestinal cancer at different stages. *Oncology*, 45(3):153–158. PMID: [3368192](#)
37. Munck-Wikland E, Kuylenstierna R, Wahren B, Lindholm J, Haglund S (1988) Tumor markers carcinoembryonic antigen, CA 50, and CA 19-9 and squamous cell carcinoma of the esophagus pretreatment screening. *Cancer*, 62(11):2281–2286. PMID: [3179942](#)
38. Uemura M, Yamasaki M, Yoshida S, Uezima T, Sakaguchi T, et al. (1990) An enzyme immunoassay for galactosyltransferase isoenzyme II, and its clinical application to cancer diagnosis. *Clinical chemistry*, 36(4):598–601. PMID: [1691054](#)
39. Yamamoto K, Oka M, Hayashi H, Tangoku A, Gondo T, et al. (1997) CYFRA 21-1 is a useful marker for esophageal squamous cell carcinoma. *Cancer*, 79(9):1647–1655. PMID: [9128978](#)
40. Ren J, Chen Z, Zhou SJ, Zhang XY, Pan BR, et al. (2000) Detection of circulating gastric carcinoma-associated antigen MG7-Ag in human sera using an established single determinant immunopolymerase chain reaction technique. *Cancer*, 88(2):280–285. PMID: [10640958](#)
41. Wang J, Zhu Y, Yang Z, Zhang L, Li X (2000) Clinical Evaluation of Combined Serum Tumor Markers (CA242 and CEA) in the Diagnosis of Gastrointestinal Malignant Tumor. *Journal of Capital University of Medical Sciences*, 21(4):292–294.
42. Feng X, Qu Z, Gao S, Wang Z, Shan T, et al. (2006) Application value of 12 tumor markers protein biochip in diagnoses of 5 kinds of common malignant tumor. *Henan Medical Research*, 15(4):322–324.
43. Mroczo B, Kozłowski M, Groblewska M, Łukaszewicz M, Nikliński J, et al. (2008) The diagnostic value of the measurement of matrix metalloproteinase 9 (MMP-9), squamous cell cancer antigen (SCC) and carcinoembryonic antigen (CEA) in the sera of esophageal cancer patients. *Clinica Chimica Acta*, 389(1):61–66.
44. Ma J, Liu X, Ni X, Fu L, Xu Y (2009) Protein biochip application in diagnosis of malignant tumor with combined measurement of multiple serum tumor markers. *Chinese Journal of Health Laboratory Technology* (11):2620–2622.
45. Mao X, Wang S, Chen J, Wang H (2009) The application of the angiopoietin-2 in early diagnosis of the lung cancer, esophageal cancer *Chinese Journal of Clinical Laboratory Science*, 27(5):384–385.
46. Wu X, Mou Z (2009) The clinical value of detecting serum CEA in patients with esophageal cancer. *Chinese Practical Medicine*, 4(31):77–78.
47. Zhao W (2009) The clinical significance of plasma DNA analysis for different types of gastrointestinal malignancies. Nanjing Medical University.;
48. Liu W, Xu H, Han J (2010) The combination detection of the serum CA19–9, CA724, CEA, CYFRA21–1 in the diagnosis of esophageal cancer *Shandong Medicine*, 50(10):68–69.
49. He J, Ding J, Yu W (2011) Diagnostic value of multiple tumor markers protein biochip for patients with esophageal carcinoma. *Journal of Shanxi Medicine*, 40(3):280–283.
50. Huang Z, Pu R (2011) The diagnostic value of serum tumor marker CEA, SCC and CYFRA21–1 detection in early diagnosis of esophageal cancer. *Contemporary Medicin*, 17(004):115–116.
51. Łukaszewicz-Zaj c M, Mroczo B, Kozłowski M, Nikliński J, Laudański J, Szmikowski M (2012) Higher importance of interleukin 6 than classic tumor markers (carcinoembryonic antigen and squamous cell cancer antigen) in the diagnosis of esophageal cancer patients. *Diseases of the Esophagus*, 25(3):242–249. doi: [10.1111/j.1442-2050.2011.01242.x](#) PMID: [21895853](#)
52. Chen Z, Huang Y (2008) Study on the serum tumor marker levels in Xinjiang patients of the minority with esophageal cancer. *Journal of Xinjiang Medical University*, 31(12).
53. Cao M, Yie S-M, Wu S-M, Chen S, Lou B, et al. (2009) Detection of survivin-expressing circulating cancer cells in the peripheral blood of patients with esophageal squamous cell carcinoma and its clinical significance. *Clinical & experimental metastasis*, 26(7):751–758. doi: [10.1111/bju.12699](#) PMID: [25626182](#)

54. Cao M, Yie SM, Liu J, Ye S, Xia D, et al. (2011) Plasma soluble HLA-G is a potential biomarker for diagnosis of colorectal, gastric, esophageal and lung cancer. *Tissue antigens*, 78(2):120–128. doi: [10.1111/j.1399-0039.2011.01716.x](https://doi.org/10.1111/j.1399-0039.2011.01716.x) PMID: [21726203](https://pubmed.ncbi.nlm.nih.gov/21726203/)
55. Dong Y, Wu G, Han Z, Yuan Z, Yue K, et al. (2011) Combined determination of serum SCC and CYFRA21–1 levels on the diagnostic value of esophageal cancer and assessment of radiotherapeutic efficacy. *Radioimmunology*, 24(4):387–389.
56. Ikeda A, Nishiumi S, Shinohara M, Yoshie T, Hatano N, et al. (2012) Serum metabolomics as a novel diagnostic approach for gastrointestinal cancer. *Biomedical Chromatography*, 26(5):548–558. doi: [10.1002/bmc.1671](https://doi.org/10.1002/bmc.1671) PMID: [21773981](https://pubmed.ncbi.nlm.nih.gov/21773981/)
57. Brockmann JG, St Nottberg H, Glodny B, Sprakel B, Senninger N (1999) Analysis of serum CYFRA 21–1 concentrations in patients with esophageal cancer. *Anticancer research*, 20(6D):4899–4904. PMID: [11332443](https://pubmed.ncbi.nlm.nih.gov/11332443/)
58. Du X, Meng X, Wang C (2010) The diagnostic value of the CYFRA 21–1, CA125 for esophageal cancer by using Electrochemiluminescence. *Journal of Xinjiang Medical University* (001):46–48.
59. Krzystek-Korpacka M, Matusiewicz M, Diakowska D, Grabowski K, Blachut K, et al. (2007) Up-regulation of VEGF-C secreted by cancer cells and not VEGF-A correlates with clinical evaluation of lymph node metastasis in esophageal squamous cell carcinoma (ESCC). *Cancer letters*, 249(2):171–177. PMID: [17011116](https://pubmed.ncbi.nlm.nih.gov/17011116/)
60. Krzystek-Korpacka M, Matusiewicz M, Diakowska D, Grabowski K, Blachut K, et al. (2008) Elevation of circulating interleukin-8 is related to lymph node and distant metastases in esophageal squamous cell carcinomas—implication for clinical evaluation of cancer patient. *Cytokine*, 41(3):232–239. doi: [10.1016/j.cyto.2007.11.011](https://doi.org/10.1016/j.cyto.2007.11.011) PMID: [18182303](https://pubmed.ncbi.nlm.nih.gov/18182303/)
61. Kozłowski M, Kowalczyk O, Milewski R, Chyczewski L, Niklinski J, et al. (2010) Serum vascular endothelial growth factors C and D in patients with oesophageal cancer. *European Journal of Cardio-Thoracic Surgery*, 38(3):260–267. doi: [10.1016/j.ejcts.2010.01.061](https://doi.org/10.1016/j.ejcts.2010.01.061) PMID: [20226684](https://pubmed.ncbi.nlm.nih.gov/20226684/)
62. Gamian A, Krzystek-Korpacka M, Matusiewicz M, Diakowska D (2011) Increase in serum platelet-derived growth factor (PDGF)-BB reflects lymph node involvement in esophageal cancer patients independently from platelet count.
63. Whiting P, Rutjes AW, Reitsma JB, Bossuyt PM, Kleijnen J (2003) The development of QUADAS: a tool for the quality assessment of studies of diagnostic accuracy included in systematic reviews. *BMC medical research methodology*, 3:25. PMID: [14606960](https://pubmed.ncbi.nlm.nih.gov/14606960/)
64. Deeks JJ, Macaskill P, Irwig L (2005) The performance of tests of publication bias and other sample size effects in systematic reviews of diagnostic test accuracy was assessed. *Journal of clinical epidemiology*, 58(9):882–893. PMID: [16085191](https://pubmed.ncbi.nlm.nih.gov/16085191/)
65. Glas AS, Lijmer JG, Prins MH, Bossel GJ, Bossuyt PM (2003) The diagnostic odds ratio: a single indicator of test performance. *Journal of clinical epidemiology*, 56(11):1129–1135. PMID: [14615004](https://pubmed.ncbi.nlm.nih.gov/14615004/)
66. Deeks JJ (2001) Systematic reviews of evaluations of diagnostic and screening tests. *Systematic Reviews in Health Care: Meta-Analysis in Context*, Second Edition:248–282.
67. Graves RS (2002) Users' Guides to the Medical Literature: A Manual for Evidence-Based Clinical Practice. *Journal of the Medical Library Association*, 90(4):483.
